# Supplementary material
Source: ML conference proceedings conference paper supplement (https://openaccess.thecvf.com/content/CVPR2022/html/Yuan_Learning_Canonical_F-Correlation_CVPR_2022_paper.html)
Supplement: Supplementary file 1 [file Yuan_Learning_Canonical_F-Correlation_CVPR_2022_supplemental.pdf]

# Supplementary Material of “Learning Canonical $\mathcal{F}$ -Correlation Projection for Compact Multiview Representation”

Yun-Hao Yuan<sup>1</sup>, Jin Li<sup>1</sup>, Yun Li<sup>1</sup>, Jipeng Qiang<sup>1</sup>, Yi Zhu<sup>1</sup>, Xiaobo Shen<sup>2</sup>, Jianping Gou<sup>3</sup>

<sup>1</sup>School of Information Engineering, Yangzhou University, Yangzhou, China

<sup>2</sup>School of Computer Science, Nanjing University of Science and Technology, Nanjing, China

<sup>3</sup>School of Computer Science and Communication Engineering, Jiangsu University, Zhenjiang, China

{yhyuan, liyun, jpqiang, zhuyi}@yzu.edu.cn

cvjinli@outlook.com, njust.shenxiaobo@gmail.com, goujianping@ujs.edu.cn

## Appendix A. Proof of Theorem 1

Before demonstrating the Theorem 1, let us first provide the following theorem:

**Theorem 4 [1].** Suppose  $\psi(z)$  is continuous on  $z \geq 0$  and positive on  $z > 0$  for  $z \in \mathbb{R}$ ,  $d\psi/dz$  is completely monotonic but not constant w.r.t.  $z > 0$ . Then for a set of any distinct vectors  $\{\mathbf{f}^i \in \mathbb{R}^n\}_{i=1}^q$ ,

$$(-1)^{q-1} \det(\mathbf{H}) > 0 \quad (\text{A1})$$

holds for any  $n$  and  $q$ , where  $\det(\cdot)$  denotes the determinant of a matrix,  $\mathbf{H} \in \mathbb{R}^{q \times q}$  with  $(i, j)$ -th entry as  $\psi(\|\mathbf{f}^i - \mathbf{f}^j\|^2)$  and  $\|\cdot\|$  denotes the 2-norm of a vector.

Theorem 4 reveals that the matrix  $\mathbf{H}$ , generated by some function  $\psi(\cdot)$ , must be nonsingular due to its nonzero determinant. Using Theorem 4, we can prove Theorem 1 as follows:

**Proof of Theorem 1.** In CCP, the  $(j, t)$ -th entry of  $\mathbf{K}_{ii}^{\mathcal{F}}$  is calculated by

$$\ker(\mathbf{f}_i^j, \mathbf{f}_i^t) = \exp\left(\frac{-\|\mathbf{f}_i^j - \mathbf{f}_i^t\|^2}{2\sigma^2}\right), \quad (\text{A2})$$

where  $i = 1, 2$  and  $j, t = 1, 2, \dots, d_i$ . Let  $\psi(z)$  be

$$\psi(z) = \exp\left(\frac{-z}{2\sigma^2}\right), \quad z \in \mathbb{R}. \quad (\text{A3})$$

It follows from (A2) and (A3) that

$$\mathbf{K}_{ii}^{\mathcal{F}}(j, t) = \ker(\mathbf{f}_i^j, \mathbf{f}_i^t) = \psi(\|\mathbf{f}_i^j - \mathbf{f}_i^t\|^2). \quad (\text{A4})$$

In addition, it is easy to show that  $\psi(z)$  is continuous on  $z \geq 0$  and positive on  $z > 0$ . Also, the derivative of  $\psi(z)$  is

$$\frac{d\psi}{dz} = -\frac{1}{2\sigma^2} \exp\left(\frac{-z}{2\sigma^2}\right), \quad (\text{A5})$$

which is strictly increasing on  $z > 0$ . Hence,  $\det(\mathbf{K}_{ii}^{\mathcal{F}}) \neq 0$  holds according to Theorem 4. It follows immediately that  $\mathbf{K}_{11}^{\mathcal{F}}$  and  $\mathbf{K}_{22}^{\mathcal{F}}$  are nonsingular. ■

## Appendix B. Proof of Theorem 2

**Proof.** Let the  $i$ -th singular value of  $\tilde{\mathbf{W}}_1 \tilde{\mathbf{W}}_2^T \in \mathbb{R}^{d_1 \times d_2}$  be  $\eta_i$ ,  $i = 1, 2, \dots, \min(d_1, d_2)$ . Since  $\tilde{\mathbf{W}}_1^T \tilde{\mathbf{W}}_1 = \mathbf{I}_d$  and  $\tilde{\mathbf{W}}_2^T \tilde{\mathbf{W}}_2 = \mathbf{I}_d$ , it is easy to show that  $\tilde{\mathbf{W}}_1 \tilde{\mathbf{W}}_2^T$  has  $d$  unit singular values and the rest are zero, i.e.,  $\eta_1 = \eta_2 = \dots = \eta_d = 1$ . Using the Von-Neumann’s trace inequality [2], we have

$$\begin{aligned} \text{Tr}\left(\tilde{\mathbf{W}}_1^T \tilde{\mathbf{K}}_{12}^{\mathcal{F}} \tilde{\mathbf{W}}_2\right) &= \text{Tr}\left(\left(\tilde{\mathbf{W}}_1 \tilde{\mathbf{W}}_2^T\right)^T \tilde{\mathbf{K}}_{12}^{\mathcal{F}}\right) \\ &\leq \sum_{i=1}^r \eta_i \sigma_i = \sum_{i=1}^d \sigma_i, \end{aligned} \quad (\text{B1})$$

where the first equality applies the matrix property  $\text{Tr}(\mathbf{AB}) = \text{Tr}(\mathbf{BA})$ .

This means that the maximum value of optimization problem in (12) is the sum of the top  $d$  singular values of  $\tilde{\mathbf{K}}_{12}^{\mathcal{F}}$ . Using (13), we have

$$\begin{aligned} \text{Tr}\left(\tilde{\mathbf{W}}_1^T \tilde{\mathbf{K}}_{12}^{\mathcal{F}} \tilde{\mathbf{W}}_2\right) &= \text{Tr}\left(\left(\mathbf{U}(:, 1:d)\right)^T \mathbf{U} \mathbf{\Sigma} \mathbf{V}^T \left(\mathbf{V}(:, 1:d)\right)\right) \\ &= \text{Tr}\left(\left[\mathbf{I}_d \quad \mathbf{0}\right] \begin{bmatrix} \mathbf{\Sigma}_d & \\ & \mathbf{\Sigma}_{r-d} \end{bmatrix} \begin{bmatrix} \mathbf{I}_d \\ \mathbf{0} \end{bmatrix}\right) \\ &= \text{Tr}(\mathbf{\Sigma}_d) = \sum_{i=1}^d \sigma_i, \end{aligned} \quad (\text{B2})$$

where  $\mathbf{\Sigma}_d = \text{diag}(\sigma_1, \sigma_2, \dots, \sigma_d)$  and  $\mathbf{\Sigma}_{r-d} = \text{diag}(\sigma_{d+1}, \dots, \sigma_r)$ . Hence,  $\tilde{\mathbf{W}}_1 = \mathbf{U}(:, 1:d)$  and  $\tilde{\mathbf{W}}_2 = \mathbf{V}(:, 1:d)$  are a solution of optimization problem in (12). ■

## Appendix C. Derivation of Updating Rules in (18) and (19)

For optimization problem in (17), using the Lagrange multiplier technique we can obtain the following

$$\mathcal{L} = \sum_{i=1}^m \sum_{j=1}^m \tilde{\mathbf{w}}_i^T \mathbf{P}_i^T \tilde{\mathbf{K}}_{ij}^{\mathcal{F}} \mathbf{P}_j \tilde{\mathbf{w}}_j - \sum_{i=1}^m \lambda_i (\tilde{\mathbf{w}}_i^T \tilde{\mathbf{w}}_i - 1), \quad (\text{C1})$$

where  $\{\lambda_i \in \mathbb{R}\}_{i=1}^m$  are the Lagrange multipliers. Taking the derivative of  $\mathcal{L}$  w.r.t.  $\tilde{\mathbf{w}}_i$  and setting it to  $\mathbf{0}$ , we obtain

$$\frac{\partial \mathcal{L}}{\partial \tilde{\mathbf{w}}_i} = 2 \sum_{j=1}^m \mathbf{P}_i^T \tilde{\mathbf{K}}_{ij}^{\mathcal{F}} \mathbf{P}_j \tilde{\mathbf{w}}_j - 2\lambda_i \tilde{\mathbf{w}}_i = \mathbf{0} \quad (\text{C2})$$

with  $i = 1, 2, \dots, m$ . It follows from (C2) that

$$\sum_{j=1}^m \mathbf{P}_i^T \tilde{\mathbf{K}}_{ij}^{\mathcal{F}} \mathbf{P}_j \tilde{\mathbf{w}}_j = \lambda_i \tilde{\mathbf{w}}_i, \quad i = 1, 2, \dots, m. \quad (\text{C3})$$

According to (C3) and  $\tilde{\mathbf{w}}_i^T \tilde{\mathbf{w}}_i = 1$ , we can obtain the following updating rules:

$$\lambda_i \leftarrow \left\| \sum_{j=1}^m \mathbf{P}_i^T \tilde{\mathbf{K}}_{ij}^{\mathcal{F}} \mathbf{P}_j \tilde{\mathbf{w}}_j \right\|,$$

$$\tilde{\mathbf{w}}_i \leftarrow \frac{1}{\lambda_i} \sum_{j=1}^m \mathbf{P}_i^T \tilde{\mathbf{K}}_{ij}^{\mathcal{F}} \mathbf{P}_j \tilde{\mathbf{w}}_j.$$

## Appendix D. Proof of Theorem 3

We can rewrite (C3) as the following concise form:

$$\tilde{\mathbf{K}} \tilde{\mathbf{w}} = \Lambda \tilde{\mathbf{w}}, \quad (\text{D1})$$

where  $\tilde{\mathbf{K}} \in \mathbb{R}^{h \times h}$  is a block matrix with the  $(i, j)$ -th block element as  $\mathbf{P}_i^T \tilde{\mathbf{K}}_{ij}^{\mathcal{F}} \mathbf{P}_j$ ,  $\tilde{\mathbf{w}} = [\tilde{\mathbf{w}}_1^T, \tilde{\mathbf{w}}_2^T, \dots, \tilde{\mathbf{w}}_m^T]^T \in \mathbb{R}^h$ ,  $\Lambda = \text{diag}(\lambda_1 \mathbf{I}_{d_1}, \lambda_2 \mathbf{I}_{d_2}, \dots, \lambda_m \mathbf{I}_{d_m}) \in \mathbb{R}^{h \times h}$ , and  $h = \sum_{i=1}^m d_i$ .

Next, let us first provide the following two important lemmas, which play the key roles to complete the proof of Theorem 3.

**Lemma 1.** The matrix  $\tilde{\mathbf{K}}$  in (D1) is symmetric positive semi-definite.

**Proof.** Let  $\phi(\mathbf{X}_i) = [\phi(\mathbf{f}_i^1), \phi(\mathbf{f}_i^2), \dots, \phi(\mathbf{f}_i^{d_i})]^T \in \mathbb{R}^{d_i \times N}$ ,  $i = 1, 2, \dots, m$ . Let us denote

$$\mathbf{P} = \text{diag}(\mathbf{P}_1, \mathbf{P}_2, \dots, \mathbf{P}_m) \in \mathbb{R}^{h \times h},$$

$$\mathbf{D} = \text{diag}\left((\mathbf{K}_{11}^{\mathcal{F}})^{-\frac{1}{2}}, (\mathbf{K}_{22}^{\mathcal{F}})^{-\frac{1}{2}}, \dots, (\mathbf{K}_{mm}^{\mathcal{F}})^{-\frac{1}{2}}\right) \in \mathbb{R}^{h \times h},$$

$$\phi(\mathbf{X}) = [\phi(\mathbf{X}_1)^T, \phi(\mathbf{X}_2)^T, \dots, \phi(\mathbf{X}_m)^T]^T \in \mathbb{R}^{h \times N}$$

with  $\mathbf{X} = [\mathbf{X}_1^T, \mathbf{X}_2^T, \dots, \mathbf{X}_m^T]^T \in \mathbb{R}^{h \times N}$ . Note that  $\mathbf{D}^T = \mathbf{D}$  due to the symmetry of each  $(\mathbf{K}_{ii}^{\mathcal{F}})^{-\frac{1}{2}}$ . Then, we have that

$$\tilde{\mathbf{K}} = \mathbf{P}^T \mathbf{D} \phi(\mathbf{X}) \phi(\mathbf{X})^T \mathbf{D} \mathbf{P}. \quad (\text{D2})$$

Clearly  $\tilde{\mathbf{K}}$  is symmetric. For an arbitrary nonzero vector  $\xi \in \mathbb{R}^h$ , it follows from (D2) that

$$\begin{aligned} \xi^T \tilde{\mathbf{K}} \xi &= \xi^T \mathbf{P}^T \mathbf{D} \phi(\mathbf{X}) \phi(\mathbf{X})^T \mathbf{D} \mathbf{P} \xi \\ &= (\phi(\mathbf{X})^T \mathbf{D} \mathbf{P} \xi)^T (\phi(\mathbf{X})^T \mathbf{D} \mathbf{P} \xi) \\ &\geq 0. \end{aligned} \quad (\text{D3})$$

Hence,  $\tilde{\mathbf{K}}$  is symmetric positive semi-definite.  $\blacksquare$

**Lemma 2.** Let the largest eigenvalue of  $\tilde{\mathbf{K}}$  be  $\delta_1$  and  $\tilde{\mathbf{w}}_i^T \tilde{\mathbf{w}}_i = 1$ ,  $i = 1, 2, \dots, m$ . Then,  $\tilde{\mathbf{w}}^T \tilde{\mathbf{K}} \tilde{\mathbf{w}} \leq m\delta_1$ , where  $\tilde{\mathbf{w}}$  is defined in (D1).

**Proof.** Let the eigenvalue decomposition of  $\tilde{\mathbf{K}}$  be

$$\tilde{\mathbf{K}} = \mathbf{G} \Delta \mathbf{G}^T = \sum_{i=1}^h \delta_i \mathbf{g}_i \mathbf{g}_i^T, \quad (\text{D4})$$

where  $\mathbf{G} = [\mathbf{g}_1, \mathbf{g}_2, \dots, \mathbf{g}_h] \in \mathbb{R}^{h \times h}$  is an orthogonal matrix, and  $\Delta = \text{diag}(\delta_1, \delta_2, \dots, \delta_h) \in \mathbb{R}^{h \times h}$  is a diagonal matrix consisting of  $h$  nonnegative eigenvalues in descending order.

Using (D4), we have

$$\begin{aligned} \tilde{\mathbf{w}}^T \tilde{\mathbf{K}} \tilde{\mathbf{w}} &= \sum_{i=1}^h \delta_i \tilde{\mathbf{w}}^T \mathbf{g}_i \mathbf{g}_i^T \tilde{\mathbf{w}} = \sum_{i=1}^h \delta_i (\tilde{\mathbf{w}}^T \mathbf{g}_i)^2 \\ &\leq \delta_1 \sum_{i=1}^h (\tilde{\mathbf{w}}^T \mathbf{g}_i)^2 = \delta_1 \tilde{\mathbf{w}}^T \left( \sum_{i=1}^h \mathbf{g}_i \mathbf{g}_i^T \right) \tilde{\mathbf{w}} \\ &= \delta_1 \tilde{\mathbf{w}}^T \mathbf{G} \mathbf{G}^T \tilde{\mathbf{w}} = \delta_1 \sum_{i=1}^m \tilde{\mathbf{w}}_i^T \tilde{\mathbf{w}}_i = m\delta_1. \end{aligned} \quad (\text{D5})$$

Thus, Lemma 2 is true.  $\blacksquare$

Using Lemmas 1 and 2, now let us prove the Theorem 3: **Proof of Theorem 3.** Using (D1), we can rewrite the updating rules in (18) and (19) as

$$\tilde{\mathbf{K}} \tilde{\mathbf{w}}^{(t)} = \Lambda^{(t)} \tilde{\mathbf{w}}^{(t+1)}, \quad (\text{D6})$$

where  $\tilde{\mathbf{w}}^{(t)} = [\tilde{\mathbf{w}}_1^{(t)T}, \tilde{\mathbf{w}}_2^{(t)T}, \dots, \tilde{\mathbf{w}}_m^{(t)T}]^T$  and  $\Lambda^{(t)} = \text{diag}(\lambda_1^{(t)} \mathbf{I}_{d_1}, \lambda_2^{(t)} \mathbf{I}_{d_2}, \dots, \lambda_m^{(t)} \mathbf{I}_{d_m})$ , and  $t$  is an iterative variable.

For optimization problem in (17), let us define

$$f(\tilde{\mathbf{w}}) = \sum_{i=1}^m \sum_{j=1}^m \tilde{\mathbf{w}}_i^T \mathbf{P}_i^T \tilde{\mathbf{K}}_{ij}^{\mathcal{F}} \mathbf{P}_j \tilde{\mathbf{w}}_j = \tilde{\mathbf{w}}^T \tilde{\mathbf{K}} \tilde{\mathbf{w}}. \quad (\text{D7})$$

It follows from (D7) that

$$f(\tilde{\mathbf{w}}^{(t)}) = \tilde{\mathbf{w}}^{(t)T} \tilde{\mathbf{K}} \tilde{\mathbf{w}}^{(t)}, \quad (\text{D8})$$

$$f(\tilde{\mathbf{w}}^{(t+1)}) = \tilde{\mathbf{w}}^{(t+1)T} \tilde{\mathbf{K}} \tilde{\mathbf{w}}^{(t+1)}. \quad (\text{D9})$$

Using (D6), we are able to obtain the following

$$\begin{aligned} f(\tilde{\mathbf{w}}^{(t+1)}) - f(\tilde{\mathbf{w}}^{(t)}) &= \tilde{\mathbf{w}}^{(t+1)T} \tilde{\mathbf{K}} \tilde{\mathbf{w}}^{(t+1)} - \tilde{\mathbf{w}}^{(t)T} \tilde{\mathbf{K}} \tilde{\mathbf{w}}^{(t)} \\ &= \tilde{\mathbf{w}}^{(t+1)T} \tilde{\mathbf{K}} \tilde{\mathbf{w}}^{(t+1)} - \tilde{\mathbf{w}}^{(t+1)T} \Lambda^{(t)} \tilde{\mathbf{w}}^{(t)} \\ &\quad + \tilde{\mathbf{w}}^{(t+1)T} \left( \Lambda^{(t)} \tilde{\mathbf{w}}^{(t+1)} - \tilde{\mathbf{K}} \tilde{\mathbf{w}}^{(t)} \right) \quad (\text{D10}) \\ &= \tilde{\mathbf{w}}^{(t+1)T} \tilde{\mathbf{K}} \left( \tilde{\mathbf{w}}^{(t+1)} - \tilde{\mathbf{w}}^{(t)} \right) \\ &\quad + \tilde{\mathbf{w}}^{(t+1)T} \Lambda^{(t)} \left( \tilde{\mathbf{w}}^{(t+1)} - \tilde{\mathbf{w}}^{(t)} \right). \end{aligned}$$

In addition, it is easy to obtain that  $\tilde{\mathbf{w}}^{(t)T} \Lambda^{(t)} \tilde{\mathbf{w}}^{(t)} = \sum_{i=1}^m \lambda_i^{(t)} = \tilde{\mathbf{w}}^{(t+1)T} \Lambda^{(t)} \tilde{\mathbf{w}}^{(t+1)}$ . Together with (D6), we have

$$\begin{aligned} 0 &= \left( \tilde{\mathbf{w}}^{(t+1)T} \Lambda^{(t)} \tilde{\mathbf{w}}^{(t+1)} - \tilde{\mathbf{w}}^{(t)T} \Lambda^{(t)} \tilde{\mathbf{w}}^{(t)} \right) \\ &\quad + \left( \tilde{\mathbf{w}}^{(t)T} \tilde{\mathbf{K}} \tilde{\mathbf{w}}^{(t)} - \tilde{\mathbf{w}}^{(t)T} \tilde{\mathbf{K}} \tilde{\mathbf{w}}^{(t)} \right) \\ &= \left( \tilde{\mathbf{w}}^{(t)T} \tilde{\mathbf{K}} \tilde{\mathbf{w}}^{(t+1)} - \tilde{\mathbf{w}}^{(t)T} \Lambda^{(t)} \tilde{\mathbf{w}}^{(t)} \right) \\ &\quad + \left( \tilde{\mathbf{w}}^{(t)T} \Lambda^{(t)} \tilde{\mathbf{w}}^{(t+1)} - \tilde{\mathbf{w}}^{(t)T} \tilde{\mathbf{K}} \tilde{\mathbf{w}}^{(t)} \right) \quad (\text{D11}) \\ &= \tilde{\mathbf{w}}^{(t)T} \tilde{\mathbf{K}} \left( \tilde{\mathbf{w}}^{(t+1)} - \tilde{\mathbf{w}}^{(t)} \right) \\ &\quad + \tilde{\mathbf{w}}^{(t)T} \Lambda^{(t)} \left( \tilde{\mathbf{w}}^{(t+1)} - \tilde{\mathbf{w}}^{(t)} \right). \end{aligned}$$

Subtracting (D11) from (D10) leads to

$$\begin{aligned} f(\tilde{\mathbf{w}}^{(t+1)}) - f(\tilde{\mathbf{w}}^{(t)}) &= \left( \tilde{\mathbf{w}}^{(t+1)T} - \tilde{\mathbf{w}}^{(t)T} \right) \tilde{\mathbf{K}} \left( \tilde{\mathbf{w}}^{(t+1)} - \tilde{\mathbf{w}}^{(t)} \right) \\ &\quad + \left( \tilde{\mathbf{w}}^{(t+1)T} - \tilde{\mathbf{w}}^{(t)T} \right) \Lambda^{(t)} \left( \tilde{\mathbf{w}}^{(t+1)} - \tilde{\mathbf{w}}^{(t)} \right) \\ &= \left( \tilde{\mathbf{w}}^{(t+1)} - \tilde{\mathbf{w}}^{(t)} \right)^T \left( \tilde{\mathbf{K}} + \Lambda^{(t)} \right) \left( \tilde{\mathbf{w}}^{(t+1)} - \tilde{\mathbf{w}}^{(t)} \right). \quad (\text{D12}) \end{aligned}$$

In (D12),  $\Lambda^{(t)}$  is a positive semi-definite diagonal matrix because its each diagonal entry is not less than 0 (see the updating rule in (18)). Together with Lemma 1, we have that  $\tilde{\mathbf{K}} + \Lambda^{(t)}$  is bound to be symmetric positive semi-definite. Thus, we obtain

$$f(\tilde{\mathbf{w}}^{(t+1)}) - f(\tilde{\mathbf{w}}^{(t)}) \geq 0 \Leftrightarrow f(\tilde{\mathbf{w}}^{(t+1)}) \geq f(\tilde{\mathbf{w}}^{(t)}), \quad (\text{D13})$$

which shows that the objective function in (17) is nondecreasing. In terms of Lemma 2, the objective function has a upper bound. Putting these two conclusions together results in the convergence of the objective function. This completes the proof of Theorem 3. ■

## References

- [1] C. A. Micchelli. Interpolation of scattered data: Distance matrices and conditionally positive definite functions. *Constructive Approximation*, 2:11–12, 1986. 1
- [2] J. Von Neumann. Some matrix-inequalities and metrization of matrix-space. *Tomsk University Review*, 1:286–300, 1937. 1
